# Supplementary material for: Comprehensive Functional Characterization and Clinical Interpretation of 20 Splice-Site Variants of the RAD51C Gene
Source: MDPI journal article supplement (doi:10.3390/cancers12123771), 2020-12-15
Supplement: s1 [file s1]

*Bam*HI

GGATCCccccaaagtactgggatttttaggcatgagccactgtgtccggccaaactgaaaaattaaatggttgatagaatgtt  
gcatttttatgtttctccactcctagcatcactgttgtctacaaattaataagacaatcgattatcatgttacacttttaa  
atctctaaaattagggtttctttttctttttactttcagAAGTTGGGATATCTAAAGCAGAAGCCTTAGAAACTCTGCA  
AATTATCAGAAGAGAATGTCTCAAAATAAACCAAGATATGCTGGTACATCTGAGTCACACAAGAAGTGTACAGCACTGGAA  
CTTCTTGAGCAGGAGCATACCCAGGGCTTCATAATCACCTTCTGTTTCCAGCACTAGATGATATTCTTGGGGGTGGAGTGCCTT Ex2  
TAATGAAAACAACAGAAATTTGTGGTGCACCAGGTGTTGGAAAAACACAATTATGgtaaaataaagtgttctccttttaagg  
gtgggtttaataacatattatgaaagtagtattttgtactatcgtcaggaaaccaaataagatatatgtgctcttaattt  
taagtgtgtatgtgcattaaacaaaatttagcttactattttgtgttacttcattatcccttcttgataaatgatgcaatta  
ttctgatgtcgaatccagttgatttcatatagtcgattgggttcacattatctggagtcaggaagtagacatttctg  
ttgccttggggagtatattacattttataaaaacttttagtgatacctaacctgtcattatctggagttcaaaaacactacctt  
agatcatcatcatgatttgggtgtttgtcatctttctgttgacagTATGCAGTTGGCAGTAGATGTGCAGATACCAGAATGT Ex3  
TTTGGAGGAGTGGCAGGTGAAGCAGTTTTTATTGATACAGAGGGAAGTTTTATGGTTGATAGAGTGGTAGACCTTGCTACTG  
CCTGCATTAGCAGCTTCAGCTTATAGCAGAAAAACAAGGAGAGGgtaaagttagtaaatgatcttcttttttctgtat  
taataaaagttaattgtcattttgtgcccactgtgagacctcagcaacactccatttggaaagtgaagcctaattactggacagt  
taactagtgttaactcttttactactgttacaaaatgagaatgccacagcctggactggctttttttgttccccctttta  
tgtgcacatgtaccctagaactttaattaaaagatcaggaattatgaactgtttatagtaattttgtctataattttgtcatct  
ttcagttaaagaattttgttatccaaaggagaacattttgttataaaaagcattgtttttctacaattgccaatacatcca  
aacaggtaaaactaattaagagtgtttgtgtttcagAACACCGAAAAGCTTTGGAGGATTTCACTCTTGATAATATTCTT Ex4  
TCTCATATTTATTATTTTCGCTGTCGTGACTACACAGAGTTACTGGCACAAGTTTATCTTCTTCAGATTTCTTTTCAGAAC  
ACTCAAAGgtatgagtcagactactgaaatgtaaactaaccaagtatTTTTTgaggtgtttgataagcatgaaaaataacca  
gtacagtagcataaaaatcaaagtcaggccaattgagaaaatctcttccctccttgacctacaattttatttatatttatatt  
tgttttgtgtatgtatatgtatatagtttatgtcagagtaattcatttagcaagtttaattgacacctcctttccctat  
atgctatttactgttccaggcattggggatgatagtaataaagacagaagaatatagtaataaagagagaaggtccctgc  
tctcttggagagagagagcatttttattattatttttttttttctgtaacaaatctaataattatctcttctgtatttagGT Ex5  
TCGACTAGTGATAGTGGATGGTATTGCTTTTCCATTTCTGTCATGACCTAGATGACCTGTCTCTTCTGACTCGGTTATTAAT  
GGCCTAGCCCAGCAAATGATCAGCCTTGCAAATAATCACAGATTAGCTgtaaatattaactagtgaagagagttttataaca  
aagtcaagactgtataaaatgttaatgtctagaaatgtcaaaatagcgtttgcctgacaaataatatagacatgcagttttg  
agtaaaagtacgtttgggtgggttccattaaaaaattctgggtcataagtgacgttttctggaaaaataacaagcataatta  
atctgcaacctctgcctgccccaggttcaaatgatttctcctgcctcagcctcggagtagctgggattacaggtgcagtgcca  
ccatgtctgggttaattttttgtatttttagtagagatggggtttcacaaatcttggccagactgggtctacttgataattttcaa  
agagactcacctaattttcttacattttgtttttgtagGTAATTTTAACCAATCAGATGACAACAAAGATTGATAGAAATCA Ex6  
GGCCTTGCTTGTCTGCATTAGgtgggttaattaatcagataaacatttttagtttatcacagttttcttatctctttcatt  
tgattctcatttagtactatagcttcatgaaagcagactgtatttgtcttgttactgggttaattcttagcactaagcacag  
taccgttagatagattgttctcttttagttatttacaatttttagtgaggccagacactaatgatttgcagattttcccta  
gataggtaaaaaccttgtaattcagtagattactcattttcagggtttttgaaagcaagtaatactttcgttatgttaaat  
taataaagtaagattatatttgatcagaggcgttctgagaaatgtataaccaagtcagtaagggcatatacagttattatgt  
tttttactctcagGGGAAAGTTGGGGACATGCTGCTACAATACGGCTAATCTTTTCATTGGGACCGAAAGCAAAGgtcagtac Ex7  
agaacaagtttaataactccgaatattgggttaattatactgaatgaacacttacaggtttcttagagctagtcctgtggat  
gagatatacagtgacccatgaagtacacttttgttgccttgtctgatcacctagagcaacatagaaatgtgttgttat  
tactgcatatttagctacataggaaatttttcatataaactctgttatatacatacgggttaatttgaaggggtgtatttttaa  
tatttctctcctttttgtgttcttagagaaaaatagaattattaataataaaccatacatttaaatatgagtttggt  
catctgaacttttaattaaagttcatgtgtttgtatgtatttattcttttctttaagcagGTTGGCAACATTGTACAA Ex8  
GTACCCAGCCAGAAGGAATGCACAGTACTGTTTCAAATCAAgtcagattattttgattagagtgggattttgatattgat  
ggcggttaattatctaagagagaatttacaacttgcttctgtcaacttctgtaggcagcaagcatatttgaggacagcttt  
tgatgcttagaacatttgcctcccaaatagtagtatatacagaattttagtagtcacaaatggactgaaatttattcttaagag  
cagaggaaatacttattttggggtagtgtgttccatgccatagttaaGAATTC  
EcoRI

**Figure S1. Insert sequence of minigene mgR51C\_ex2-8.** Exons 2 to 8 are indicated in upper case and cloning sites (*Bam*HI / *Eco*RI) are underlined. Structure of the insert (3,731 bp): *Bam*HI - ivs1 (200 bp) – ex2 (259 bp) – ivs2-1 (200bp) // ivs2-2 (200 bp) – ex3 (167 bp) – ivs3-1 (200 bp) // ivs3-2 (200 bp) – ex4 (134 bp) – ivs4-1 (200 bp) // ivs4-2 (200 bp) – ex5 (132 bp) – ivs 5-1 (200 bp) // ivs5-2 (200 bp) – ex6 (67 bp) – ivs6-1 (200 bp) // ivs6-2 (200 bp) – ex7 (61 bp) – ivs7-1 (200 bp) // ivs7-2 (200 bp) – ex8 (61 bp) – ivs8 (250 bp) – *Eco*RI (shortened introns are indicated by a double slash //)

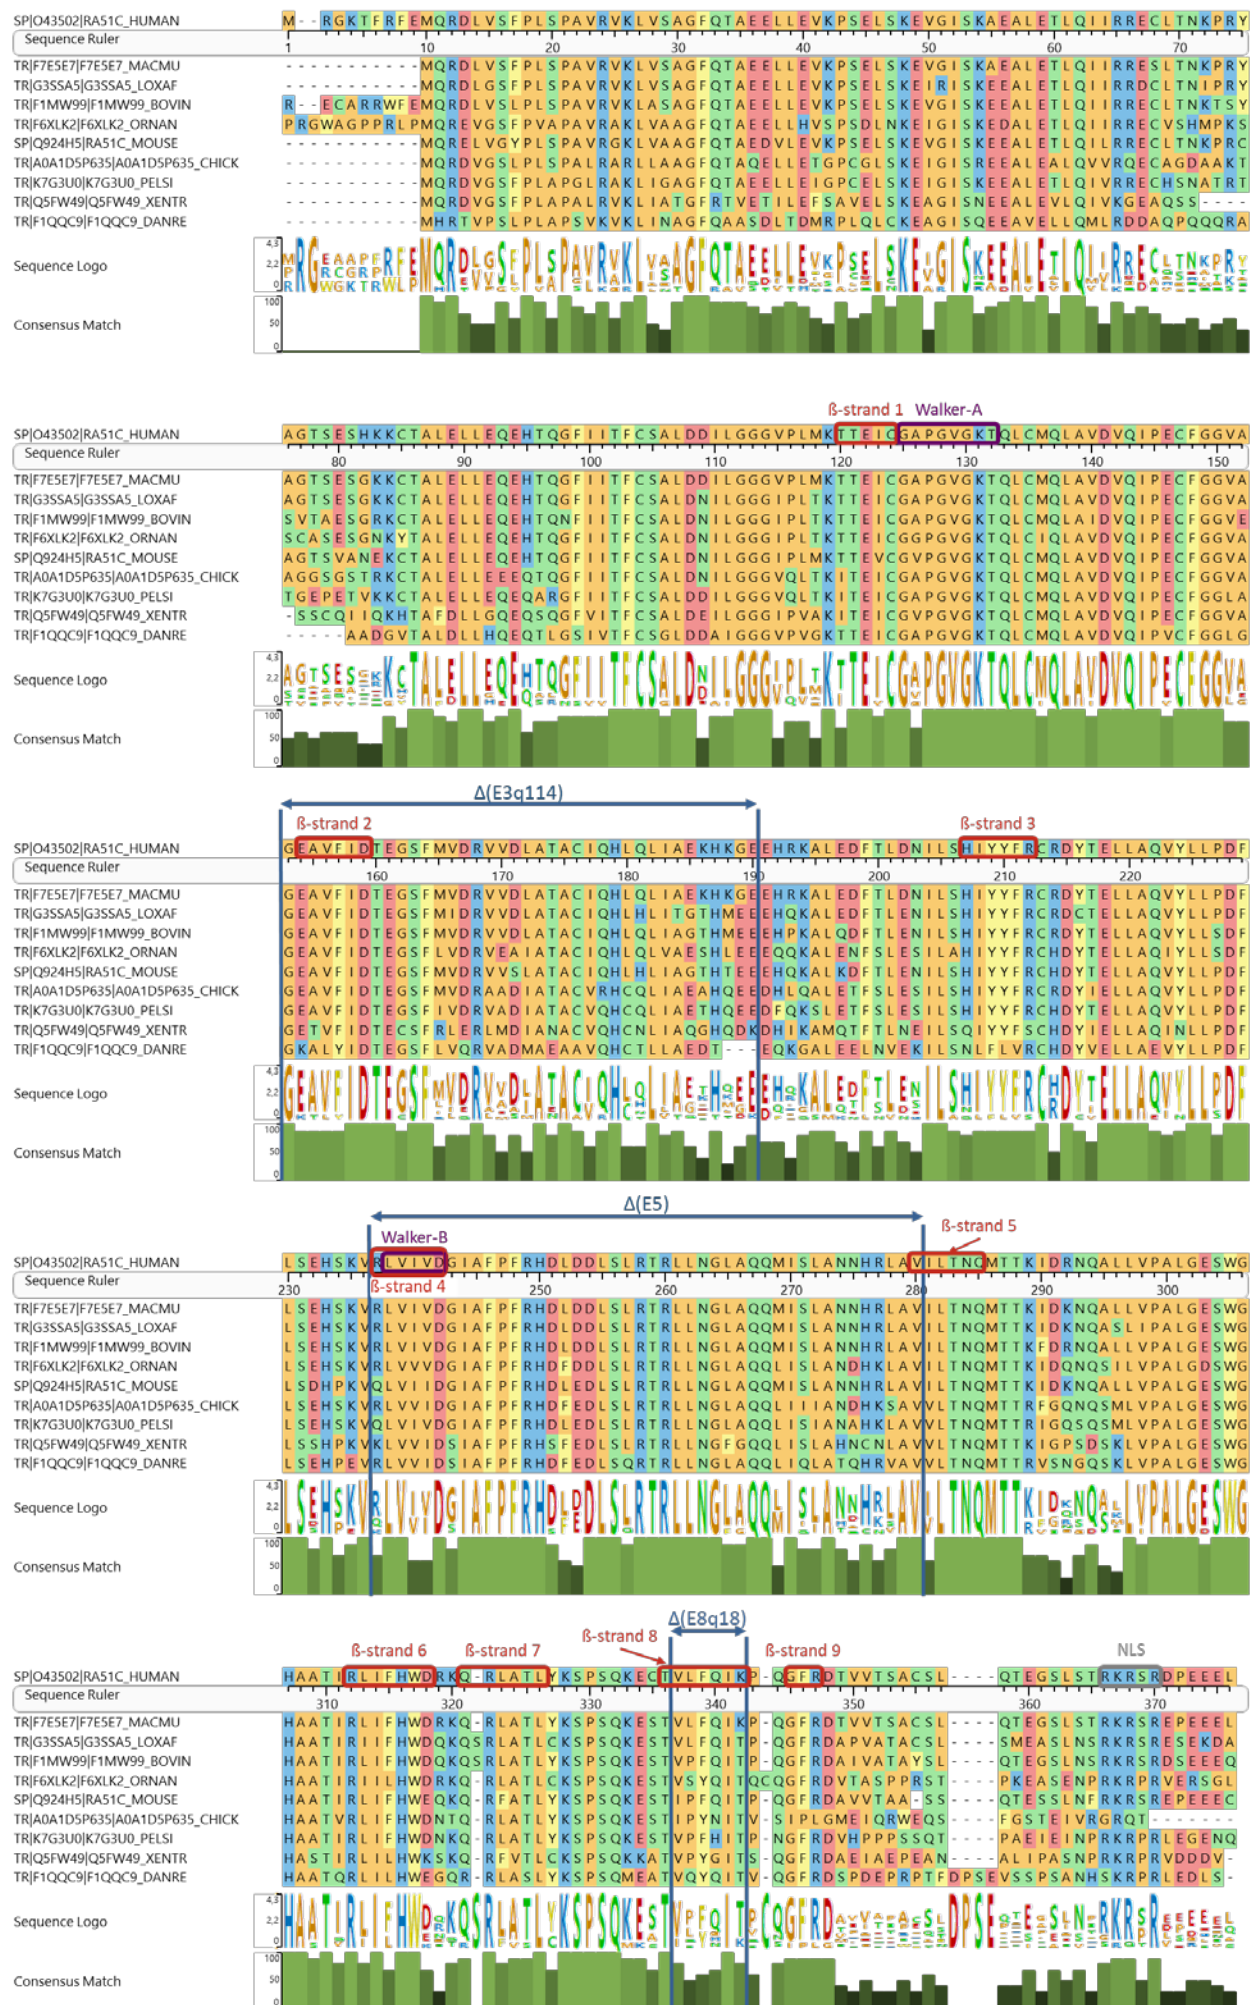

Supplementary Figure S2 (see legend on next page)

**Figure S2. Amino acid conservation of the deleted in-frame sequences of the anomalous *RAD51C* transcripts  $\Delta(E3q114)$ ,  $\Delta(E5)$  and  $\Delta(E8q18)$ .** The deleted in-frame regions are marked in blue stripes and arrows and the key functional domains of *RAD51C* are denoted as follows: the Walker domains for ATP-hydrolysis are shown in purple boxes, the  $\beta$ -strands are shown in red boxes and the nuclear localization signal (NLS) is displayed in a gray box. Protein sequences were aligned with the Align tool of the Uniprot database (<https://www.uniprot.org/align/>). The alignment file was visualized with MegAlign Pro version 15.0.0 of DNASTAR's Lasergene software. The conserved residues are highlighted (nonpolar amino acids in orange, polar amino acids in green, polar basic amino acids in blue and polar acidic amino acids in red) and the color intensity of green bars above the protein sequence indicates the degree of conservation of each amino acid. Organisms: Human (*Homo sapiens*); Rhesus Macaque (*Macaca mulatta*: MACMU); African elephant (*Loxodonta africana*: LOXAF); Bovine (*Bos taurus*: BOVIN); Duckbill platypus (*Ornithorhynchus anatinus*: ORNAN); Mouse (*Mus musculus*: MOUSE); Chicken (*Gallus gallus*: CHICK); Chinese Softshell Turtle (*Pelodiscus sinensis*: PELSI); African Clawed Frog (*Xenopus tropicalis*: XENTR); Zebrafish (*Danio rerio*: DANRE).

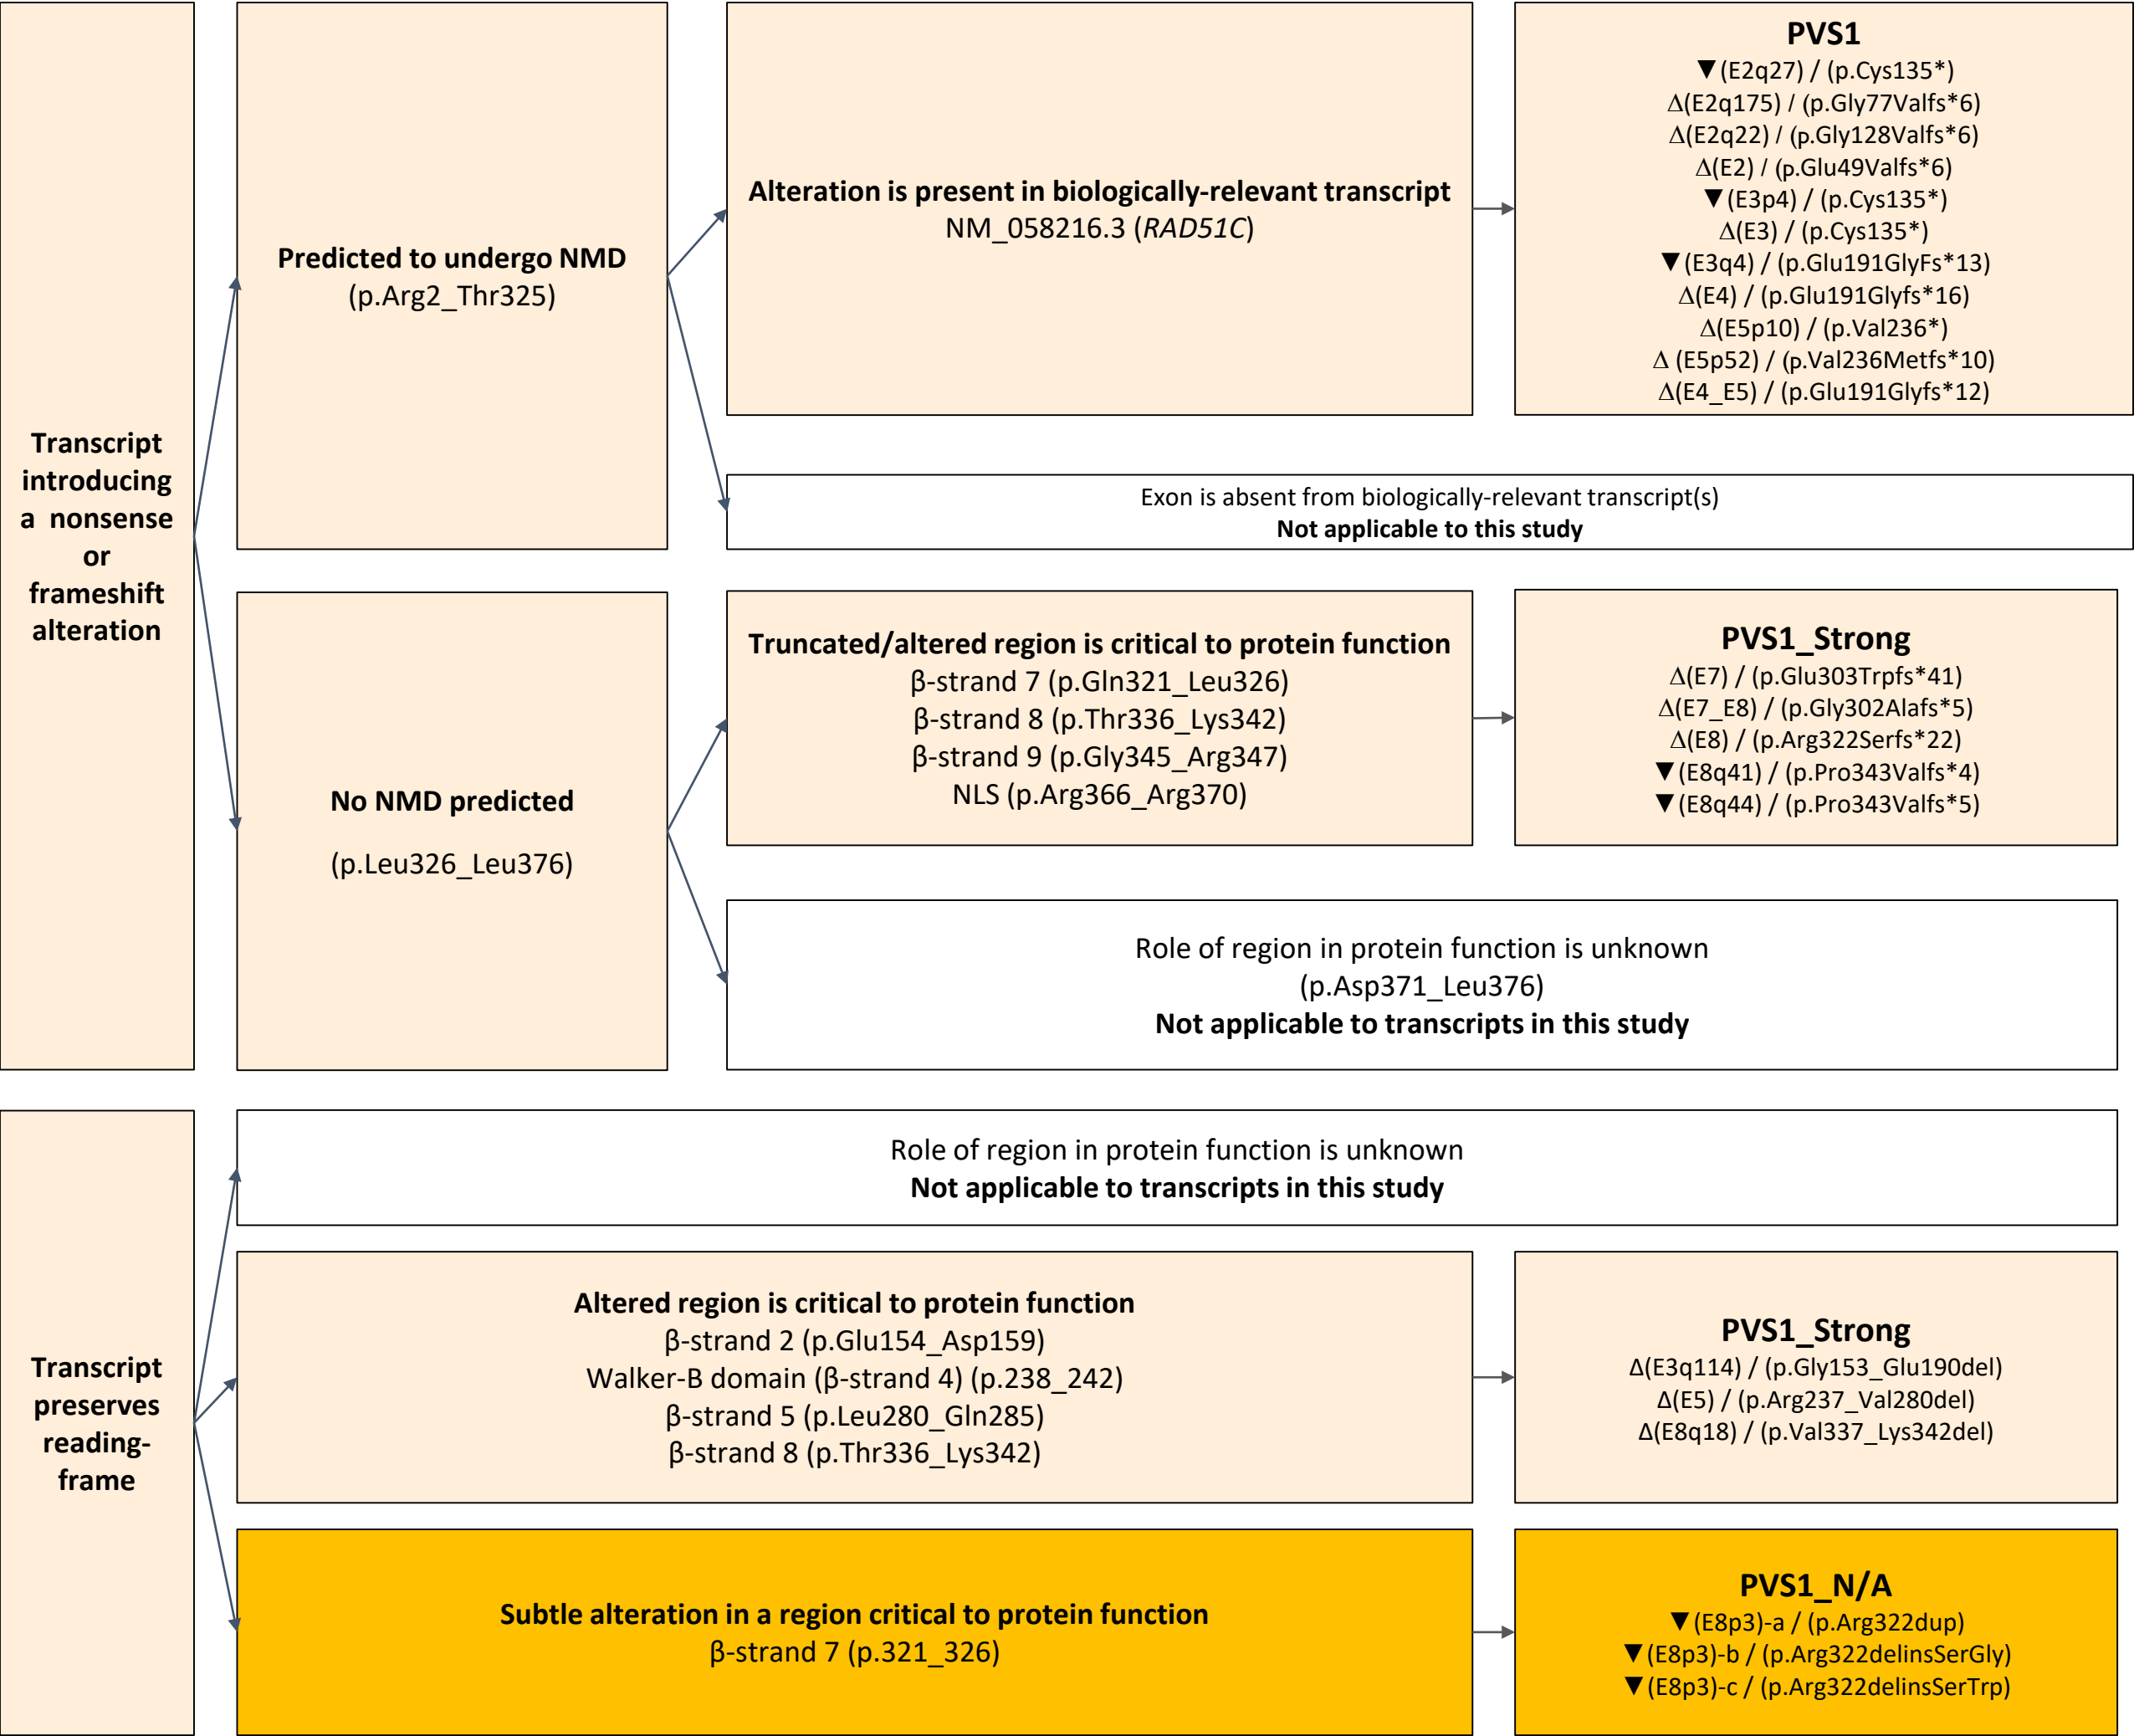

- No *RAD51C* pSAD transcript fits this criteria
- Criteria and code strength according to Abou Tayoun et al, 2018
- Criteria and code strength not in Abou Tayoun et al, 2018 (expert judgment ad-hoc addition )

**Figure S3. Loss-of-function annotation of 22 *RAD51C* altered transcripts.** We have adapted the PVS1 decision tree proposed by Tayoun and col to the specific purpose of determining the strength of the loss-of-function evidence for all 22 *RAD51C* altered transcripts produced by our pSAD analysis. The flowchart indicates the different possibilities, as proposed by Abou Tayoun and col, with the following modification: even if targeting a critical protein region (Miller et al, 2004), we propose being very conservative (PVS1\_N/A) for subtle alterations that modify only one or two amino acids.

**References**  
Abou Tayoun, A.N.; Pesaran, T.; DiStefano, M.T.; Oza, A.; Rehm, H.L.; Biesecker, L.G.; Harrison, S.M.; ClinGen Sequence Variant Interpretation Working Group (ClinGen SVI) Recommendations for interpreting the loss of function PVS1 ACMG/AMP variant criterion. Hum. Mutat. 2018, 39, 1517–1524.  
Miller, K.A.; Sawicka, D.; Barsky, D.; Albala, J.S. Domain mapping of the Rad51 paralogs protein complexes. Nucleic Acids Res. 2004, 32, 169–78.
