# Supplementary material for: Comprehensive Functional Characterization and Clinical Interpretation of 20 Splice-Site Variants of the RAD51C Gene
Source: MDPI journal article supplement (doi:10.3390/cancers12123771), 2020-12-15
Supplement: s1 [file s1]

**Table S1. Bioinformatics analysis of *RAD51C* variants with Max Ent Score.**

| <b><i>RAD51C</i><br/>VARIANTS<sup>1</sup></b> | <b>EXON/<br/>INTRON</b> | <b>MES wt</b> | <b>MES mut</b> | <b>MES score<br/>change<sup>2</sup></b> | <b>MES <i>de novo</i> SS-<br/>mut vs. wt <sup>3</sup></b> | <b>MES score<br/>change<sup>2</sup></b> |
|-----------------------------------------------|-------------------------|---------------|----------------|-----------------------------------------|-----------------------------------------------------------|-----------------------------------------|
| c.146-8A>G                                    | ivs1/Ex2                | 9.5           | 9.4            | -0.2%                                   |                                                           |                                         |
| c.146-4T>C                                    | ivs1/Ex2                | 9.5           | 9.1            | -3.4%                                   |                                                           |                                         |
| <b>c.146-3C&gt;T</b>                          | ivs1/Ex2                | 9.5           | 8.7            | -8.5%                                   |                                                           |                                         |
| c.403T>C                                      | Ex2                     | 4.8           | 6.5            | +36.3%                                  |                                                           |                                         |
| <b>c.404G&gt;A</b>                            | Ex2                     | 4.8           | -3.5           | -172.7%                                 |                                                           |                                         |
| c.404+6delA                                   | Ex2/ivs2                | 4.8           | 6.4            | +33.8%                                  |                                                           |                                         |
| c.404+13G>A                                   | Ex2/ivs2                | 4.8           | 4.8            | 0%                                      |                                                           |                                         |
| <b>c.405-6T&gt;A</b>                          | ivs2/Ex3                | 7.7           | 2.2            | -72.2%                                  | 8.6 vs. 0.2                                               | +4650%<br>4-nt upstream                 |
| <b>c.571+4A&gt;G</b>                          | Ex3/ivs3                | 10.5          | 8.1            | -22.5%                                  | 5.5 vs. 0.9                                               | +525%<br>4-nt downstream                |
| <b>c.571+5G&gt;A</b>                          | Ex3/ivs3                | 10.5          | 5.8            | -44.2%                                  |                                                           |                                         |
| c.571+5G>T                                    | Ex3/ivs3                | 10.5          | 6.6            | -36.7%                                  |                                                           |                                         |
| c.571+9G>C                                    | Ex3/ivs3                | 10.5          | 10.5           | 0%                                      |                                                           |                                         |
| c.572-8T>C                                    | ivs3/Ex4                | 7.4           | 7.5            | +0.4%                                   |                                                           |                                         |
| c.572-7G>A                                    | ivs3/Ex4                | 7.4           | 5.9            | -21.3%                                  |                                                           |                                         |
| <b>c.572-1G&gt;T</b>                          | ivs3/Ex4                | 7.4           | -1.2           | -115.6%                                 |                                                           |                                         |
| c.572A>C                                      | Ex4                     | 7.4           | 6.3            | -15.2%                                  |                                                           |                                         |
| c.573A>G                                      | Ex4                     | 7.4           | 7.3            | -1.4%                                   |                                                           |                                         |
| <b>c.705G&gt;T</b>                            | Ex4                     | 9.1           | 2.6            | -72%                                    |                                                           |                                         |
| <b>c.705+5G&gt;C</b>                          | Ex4/ivs4                | 9.1           | 7.2            | -20.8%                                  |                                                           |                                         |
| c.705+8T>C                                    | Ex4/ivs4                | 9.1           | 9.1            | 0%                                      |                                                           |                                         |
| c.706-7T>C                                    | ivs4/Ex5                | 11.1          | 10.4           | -6.4%                                   |                                                           |                                         |
| <b>c.706-2A&gt;C</b>                          | ivs4/Ex5                | 11.1          | 3.1            | -72.4%                                  | 3.3 vs. -2                                                | +263.2%<br>10-nt downstream             |
| <b>c.706-2A&gt;G</b>                          | ivs4/Ex5                | 11.1          | 3.1            | -71.7%                                  | 3.2 vs. -2                                                | +254.9%<br>10-nt downstream             |
| c.837+1G>A                                    | Ex5/ivs5                | 8.6           | 0.4            | -95.6%                                  |                                                           |                                         |
| <b>c.837+2T&gt;C</b>                          | Ex5/ivs5                | 8.6           | 0.8            | -90.5%                                  |                                                           |                                         |

| <b>RAD51C<br/>VARIANTS<sup>1</sup></b> | <b>EXON/<br/>INTRON</b> | <b>MES wt</b>                 | <b>MES mut</b> | <b>MES score<br/>change<sup>2</sup></b> | <b>MES de novo SS-<br/>mut vs. wt <sup>3</sup></b> | <b>MES score<br/>change<sup>2</sup></b> |
|----------------------------------------|-------------------------|-------------------------------|----------------|-----------------------------------------|----------------------------------------------------|-----------------------------------------|
| c.905-5C>G                             | ivs6/Ex7                | 8.2                           | 6.6            | -19.3%                                  |                                                    |                                         |
| c.905-4T>C                             | ivs6/Ex7                | 8.2                           | 8.1            | -1.2%                                   |                                                    |                                         |
| <b>c.905-3C&gt;G</b>                   | ivs6/Ex7                | 8.2                           | -4.9           | -159.4%                                 |                                                    |                                         |
| <b>c.905-2_905-1del</b>                | ivs6/Ex7                | 8.2                           | 0.6            | -93.3%                                  |                                                    |                                         |
| <b>c.905-2A&gt;C</b>                   | ivs6/Ex7                | 8.2                           | 0.1            | -98.3%                                  |                                                    |                                         |
| <b>c.965+5G&gt;A</b>                   | Ex7/ ivs7               | 8.7                           | 3.8            | -56.6%                                  |                                                    |                                         |
| c.966-8T>C                             | ivs7/Ex8                | 7.3                           | 8.5            | +17%                                    |                                                    |                                         |
| <b>c.966-3C&gt;A</b>                   | ivs7/Ex8                | 7.3                           | 4.4            | -40%                                    | 5.4 vs. 5.7                                        | -4.2%<br>3-nt upstream                  |
| <b>c.966-2A&gt;G</b>                   | ivs7/Ex8                | 7.3                           | -0.7           | -109.5%                                 | 7 vs. 5.7                                          | +22.6%<br>3-nt upstream                 |
| <b>c.966-2A&gt;T</b>                   | ivs7/Ex8                | 7.3                           | -1.1           | -115.2%                                 | 7.6 vs. 5.7                                        | +34%<br>3-nt upstream                   |
| c.967T>C                               | Ex8                     | 7.25                          | 6.5            | -10.8%                                  |                                                    |                                         |
| <b>c.1026+5_1026+7del</b>              | Ex8/ivs8                | <sup>2</sup><br>NNSplice: 0.8 | -<br><0.1      | -                                       |                                                    |                                         |
| <b>c.1026+5G&gt;T</b>                  | Ex8/ivs8                | <sup>2</sup><br>NNSplice: 0.8 | -<br><0.1      | -                                       |                                                    |                                         |
| c.1027-8T>A                            | ivs8/Ex9                | 8.6                           | 7.4            | -14.5%                                  |                                                    |                                         |
| c.1029T>C                              | Ex9                     | 8.6                           | 9.1            | +6.3%                                   | 4 vs. 3.9                                          | +2.3<br>6-nt downstream                 |

<sup>1</sup> Selected variants are shown in red.

<sup>2</sup> MES score changes ( $\Delta\%$ ), wild type (wt) vs. mutant (mut).

<sup>3</sup> *De novo*: predicted creation of new alternative splice sites: mutant score vs. wild type score.

**Table S2. RNA and protein impact according to sequence ENST00000337432.9 of *RAD51C*.**

| TRANSCRIPT <sup>1</sup> | RNA-HGVS                                      | PROTEIN-HGVS       | Diagrams of the splicing events <sup>2</sup> |
|-------------------------|-----------------------------------------------|--------------------|----------------------------------------------|
| ▼(E2q27)                | r. [404g>a,404_405ins404+1_404+27]<br>PTC-NMD | p.Cys135*          |                                              |
| Δ(E2q175)               | r.230_404del<br>PTC-NMD                       | p.Gly77Valfs*6     |                                              |
| Δ(E2q22)                | r. 383_404del<br>PTC-NMD                      | p.Gly128Valfs*6    |                                              |
| Δ(E2)                   | r. 146_404del<br>PTC-NMD                      | p.Glu49Valfs*6     |                                              |
| ▼(E3p4)                 | r.404_405ins405-4_405-1<br>PTC-NMD            | p. Cys135*         |                                              |
| Δ(E3)                   | r. 405_571del<br>PTC-NMD                      | p.Cys135*          |                                              |
| ▼(E3q4)                 | r.[571+4a>g,571_572ins571+1_571+4]<br>PTC-NMD | p.Glu191Glyfs*13   |                                              |
| Δ(E3q114)               | r. 458_571del                                 | p.Gly153_Glu190del |                                              |
| Δ(E4)                   | r. 572_705del<br>PTC-NMD                      | p.Glu191Glyfs*16   |                                              |
| Δ(E5p10)                | r. 706_715del<br>PTC-NMD                      | p.Val236*          |                                              |
| Δ(E5p52)                | r.706_757del<br>PTC-NMD                       | p.Val236Metfs*10   |                                              |

| TRANSCRIPT <sup>1</sup> | RNA-HGVS                                            | PROTEIN-HGVS         | Diagrams of the splicing events <sup>2</sup> |
|-------------------------|-----------------------------------------------------|----------------------|----------------------------------------------|
| <b>Δ(E5)</b>            | r.706_837del                                        | p.Arg237_Val280del   |                                              |
| <b>Δ(E4_5)</b>          | r.572_837del<br>PTC-NMD                             | p.Glu191Glyfs*12     |                                              |
| <b>Δ(E7)</b>            | r.905_965del<br>PTC                                 | p.Glu303Trpfs*41     |                                              |
| <b>Δ(E7_8)</b>          | r.905_1026del<br>PTC                                | p.Gly302Alafs*5      |                                              |
| <b>Δ(E8)</b>            | r.966_1026del<br>PTC                                | p.Arg322Serfs*22     |                                              |
| <b>▼(E8p3)-a</b>        | r.[966-3c>a,965_966ins966-3_966-1]                  | p.Arg322dup          |                                              |
| <b>▼(E8p3)-b</b>        | r.[966-2a>g,965_966ins966-3_966-1]                  | p.Arg322delinsSerGly |                                              |
| <b>▼(E8p3)-c</b>        | r.[966-2a>u,965_966ins966-3_966-1]                  | p.Arg322delinsSerTrp |                                              |
| <b>Δ(E8q18)</b>         | r.1009_1026del                                      | p.Val337_Lys342del   |                                              |
| <b>▼(E8q41)</b>         | r.1026_1027ins[1026+1_1026+4;1026+8_1026+44]<br>PTC | p.Pro343Valfs*4      |                                              |
| <b>▼(E8q44)</b>         | r.1026_1027ins1026+1_1026+44<br>PTC                 | p.Pro343Valfs*5      |                                              |

<sup>1</sup> Transcript annotation according to López-Perolio et al (2019) (see also in Materials and Methods).

<sup>2</sup> Anomalous exons and splicing events (broken lines) are indicated in red. Abnormal *de novo*/cryptic AG or GT sites are shown in red text.

**Table S3.** Mutagenesis primers for *RAD51C* variants

| Variant          | Exon/Intron | Primers (5'→3')                                                                                 |
|------------------|-------------|-------------------------------------------------------------------------------------------------|
| c.146-3C>T       | ivs1        | TTTTTTCTTATTTTACTTTTAGAAGTTGGGATATCTAAAG<br>CTTTAGATATCCCAACTTCTAAAAGTAAAAAAGAAAAAAA            |
| c.404G>A         | Ex2         | TGTTGGAAAAACACAATTATAGTAAAATAAAGTGTTCCT<br>AGGAGAACTTTATTTTACTATAATTGTGTTTTCCAACA               |
| c.405-6T>A       | ivs2        | GTTGTTTGTCTCTTTCTGTAGACAGTATGCAGTTGGCAGT<br>ACTGCCAACTGCATACTGTCTACAGAAAGATGACAAACAAC           |
| c.571+4A>G       | ivs3        | AAACACAAGGGAGAGGGTAGGTTAGTAAATGATCTTCTT<br>AAGAAGATCATTTACTAACCTACCCTCTCCCTTGTTT                |
| c.571+5G>A       | ivs3        | AACACAAGGGAGAGGGTAAATTAGTAAATGATCTTCTT<br>AAAGAAGATCATTTACTAATTTACCCTCTCCCTTGTTT                |
| c.572-1G>T       | ivs3        | AAGAGTGTGTTTGTGTTTCATAACACCGAAAAGCTTTGGAG<br>CTCCAAAGCTTTTCGGTGTTATGAAACAACAAAACACTCTT          |
| c.705G>T         | Ex4         | TTCTTTTCAGAACTCAAATGTATGAGTCAGACTACTGAA<br>TTCAGTAGTCTGACTCATACATTTGAGTGTCTGAAAGGAA             |
| c.705+5G>C       | ivs4        | TTCAGAACTCAAAGGTATCAGTCAGACTACTGAAATGTA<br>TACATTTCACTAGTCTGACTGATACCTTTGAGTGTCTGAA             |
| c.706-2A>C       | ivs4        | ATATTATCTCTTCTGTATTTTCGGTTCGACTAGTGATAGTGG<br>CCACTATCACTAGTCGAACCGAAATACAGAAGAGATAATAT         |
| c.706-2A>G       | ivs4        | ATATTATCTCTTCTGTATTTGGGTTTCGACTAGTGATAGTGG<br>CCACTATCACTAGTCGAACCCAAATACAGAAGAGATAATAT         |
| c.837+2T>C       | ivs5        | AAATAATCACAGATTAGCTGCAAGTATTAAGTAGTGAAGAG<br>CTCTTCACTAGTTAATACTTGCAGCTAATCTGTGATTATTT          |
| c.905-3C>G       | ivs6        | GTTATTATGTTTTTACTCTGAGGGGAAAGTTGGGGACATG<br>CATGTCCCCAACTTTCCCCTCAGAGTAAAAAACATAATAAC           |
| c.905-2A>C       | ivs6        | TTATTATGTTTTTACTCTCCGGGGAAAGTTGGGGACATGC<br>GCATGTCCCCAACTTTCCCCGGAGAGTAAAAAACATAATAA           |
| c.905-2_905-1del | ivs6        | TACAGTTATTATGTTTTTACTCTCGGGAAAGTTGGGGACATGCTG<br>CAGCATGTCCCCAACTTTCCCGAGAGTAAAAAACATAATAACTGTA |
| c.965+5G>A       | ivs7        | GGGACCGAAAGCAAAGGTCAATACAGAAACAAGTTAATAAC<br>GTTATTAAGTTGTTTCTGTATTGACCTTTGCTTTTCGGTCCC         |
| c.966-3C>A       | ivs7        | ATTTATTCTTTTTCTTTAAGAAGGTTGGCAACATTGTACAA<br>TTGTACAATGTTGCCAACCTTCTTAAAGAAAAAGAATAAAT          |
| c.966-2A>G       | ivs7        | TTTATTCTTTTTCTTTAAGCGGGTTGGCAACATTGTACAAG<br>CTTGTACAATGTTGCCAACCCGCTTAAAGAAAAAGAATAAA          |

|                           |      |                                                              |
|---------------------------|------|--------------------------------------------------------------|
| <b>c.966-2A&gt;T</b>      | ivs7 | TTTATTCTTTTTCTTTAAGCTGGTTGGCAACATTGTACAAG                    |
|                           |      | CTTGTACAATGTTGCCAACCAGCTTAAAGAAAAAGAATAAA                    |
| <b>c.1026+5_1026+7del</b> | ivs8 | GAATGCACAGTACTGTTTCAAATCAAAGTCATTATTTGATTAGAGTGGGATTTTGATATT |
|                           |      | AATATCAAAATCCCACTCTAATCAAATAATGACTTTGATTTGAAACAGTACTGTGCATTC |
| <b>c.1026+5G&gt;T</b>     | ivs8 | ACTGTTTCAAATCAAAGTCATTATTATTTGATTAGAGTGGG                    |
|                           |      | CCCACTCTAATCAAATAATAATGACTTTGATTTGAAACAGT                    |
